# Supplementary material for: Exome Sequencing of 75 Individuals from Multiply Affected Coeliac Families and Large Scale Resequencing Follow Up
Source: PubMed Central journal article supplement (PMC4312029; doi:10.1371/journal.pone.0116845), 2015-01-30
Supplement: pone.0116845.s003.pdf [file pone.0116845.s003.pdf]

Figure S3. Pedigree structures with HLA genotypes for twelve CeD pedigrees

Family BD

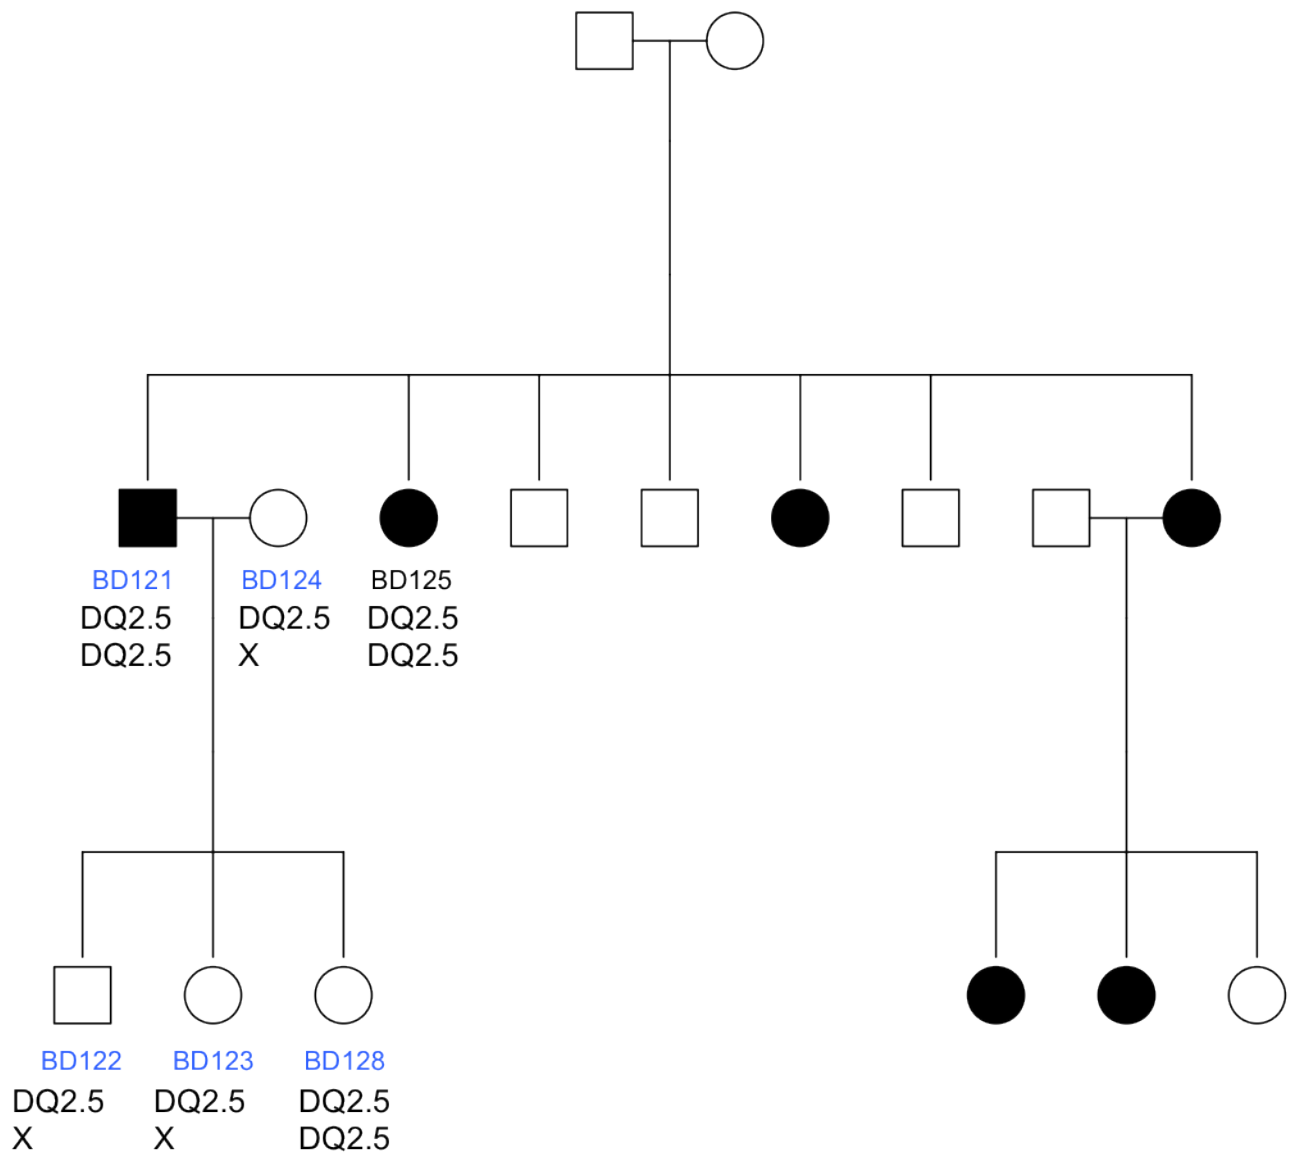

# Family BR

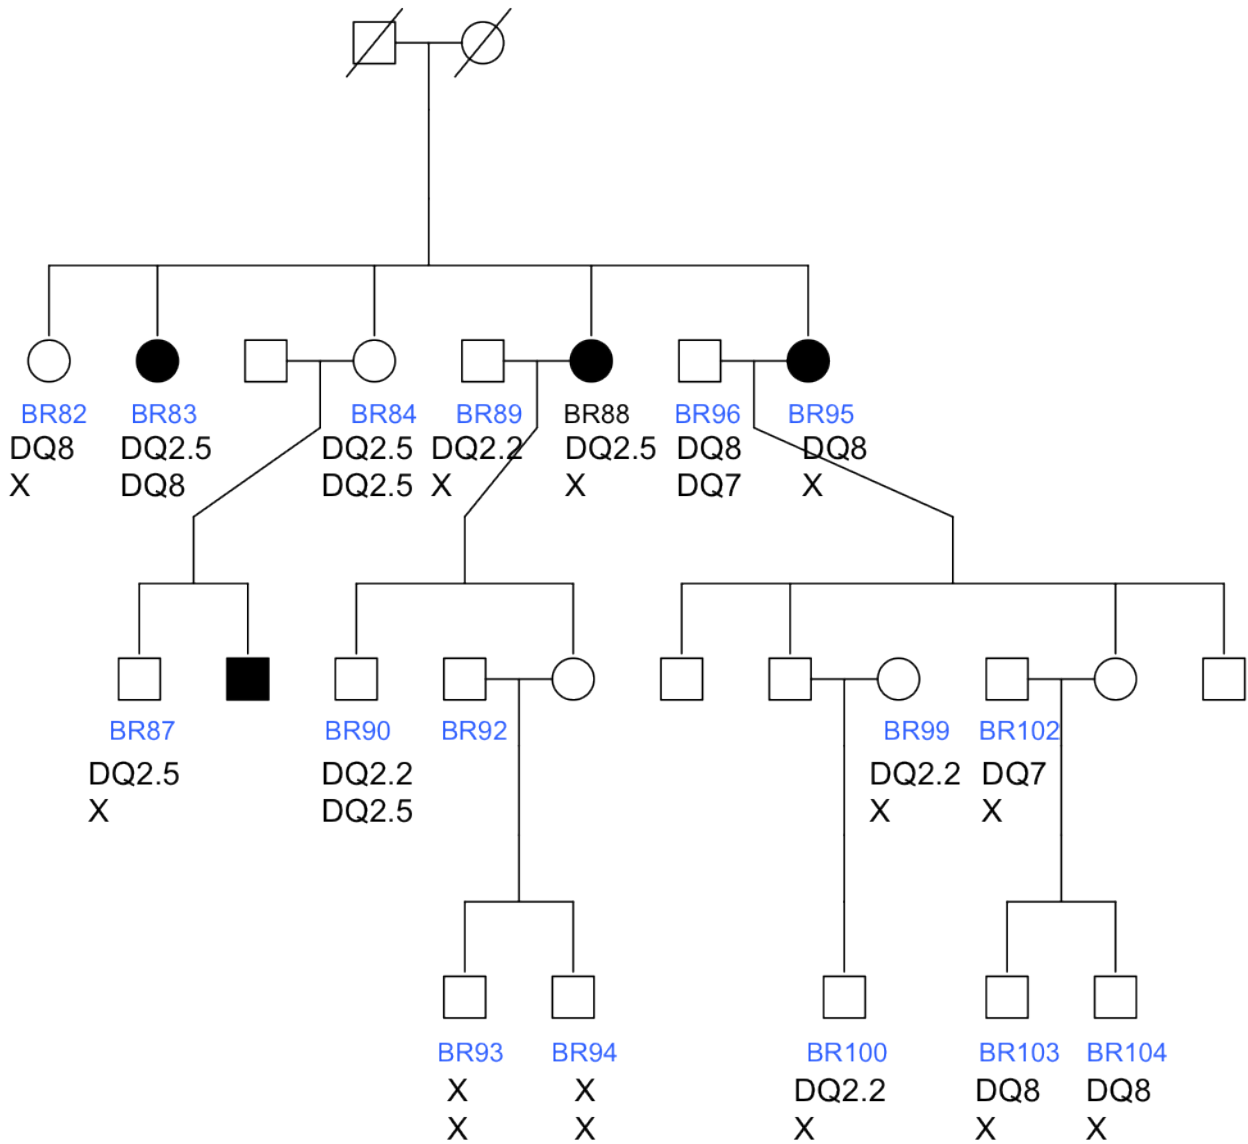

# Family BRE

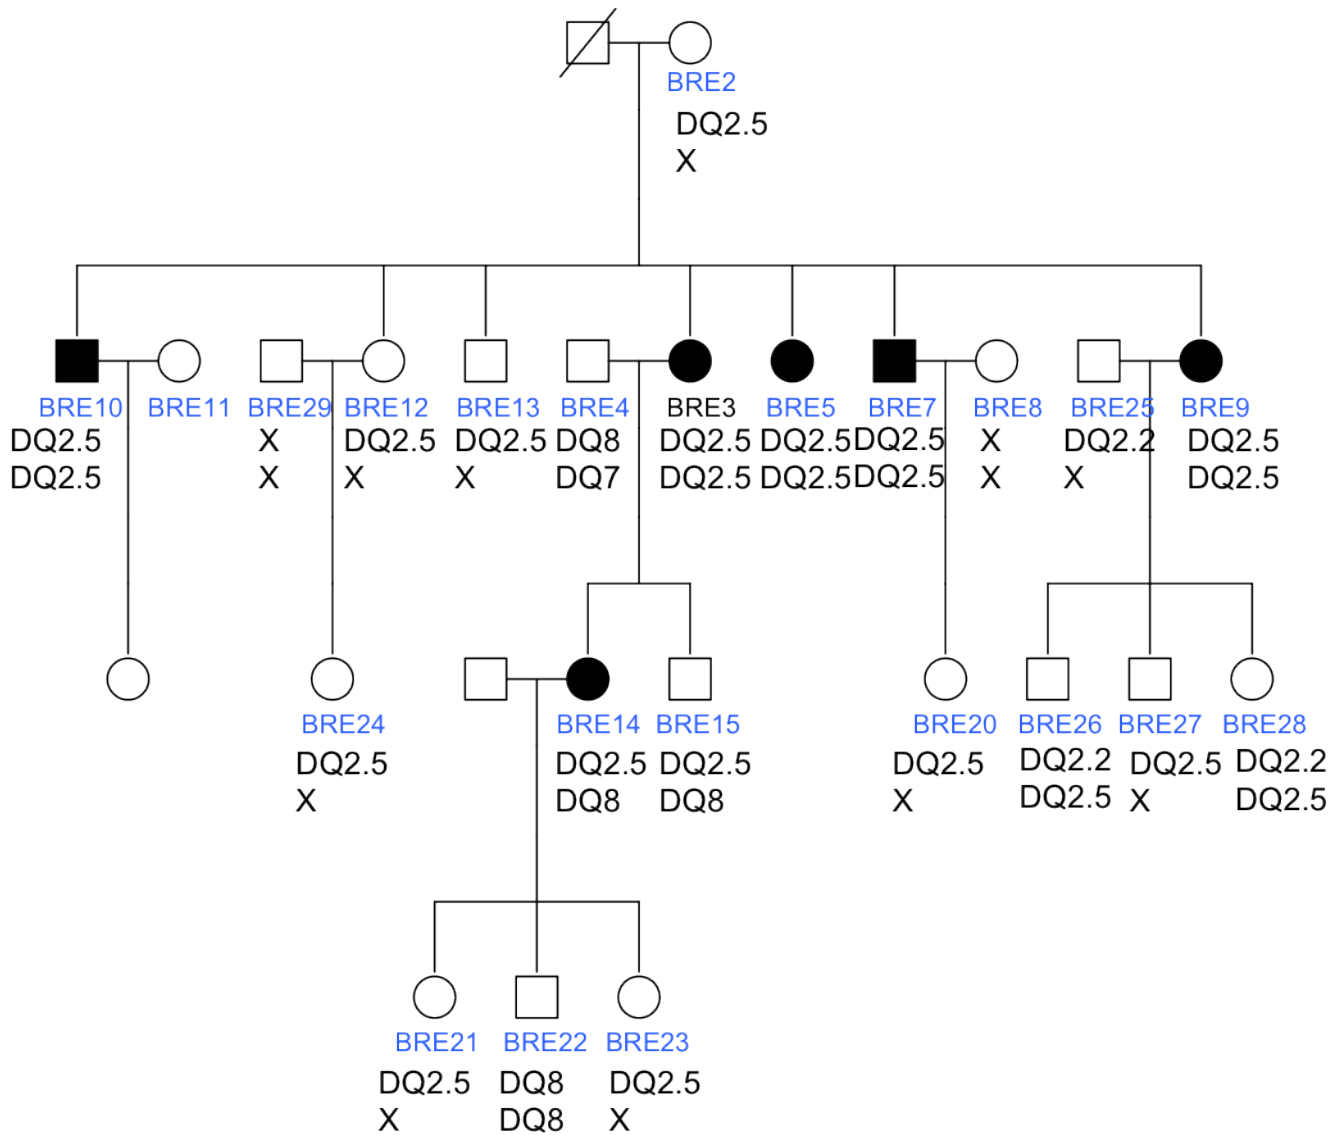

Family BRK

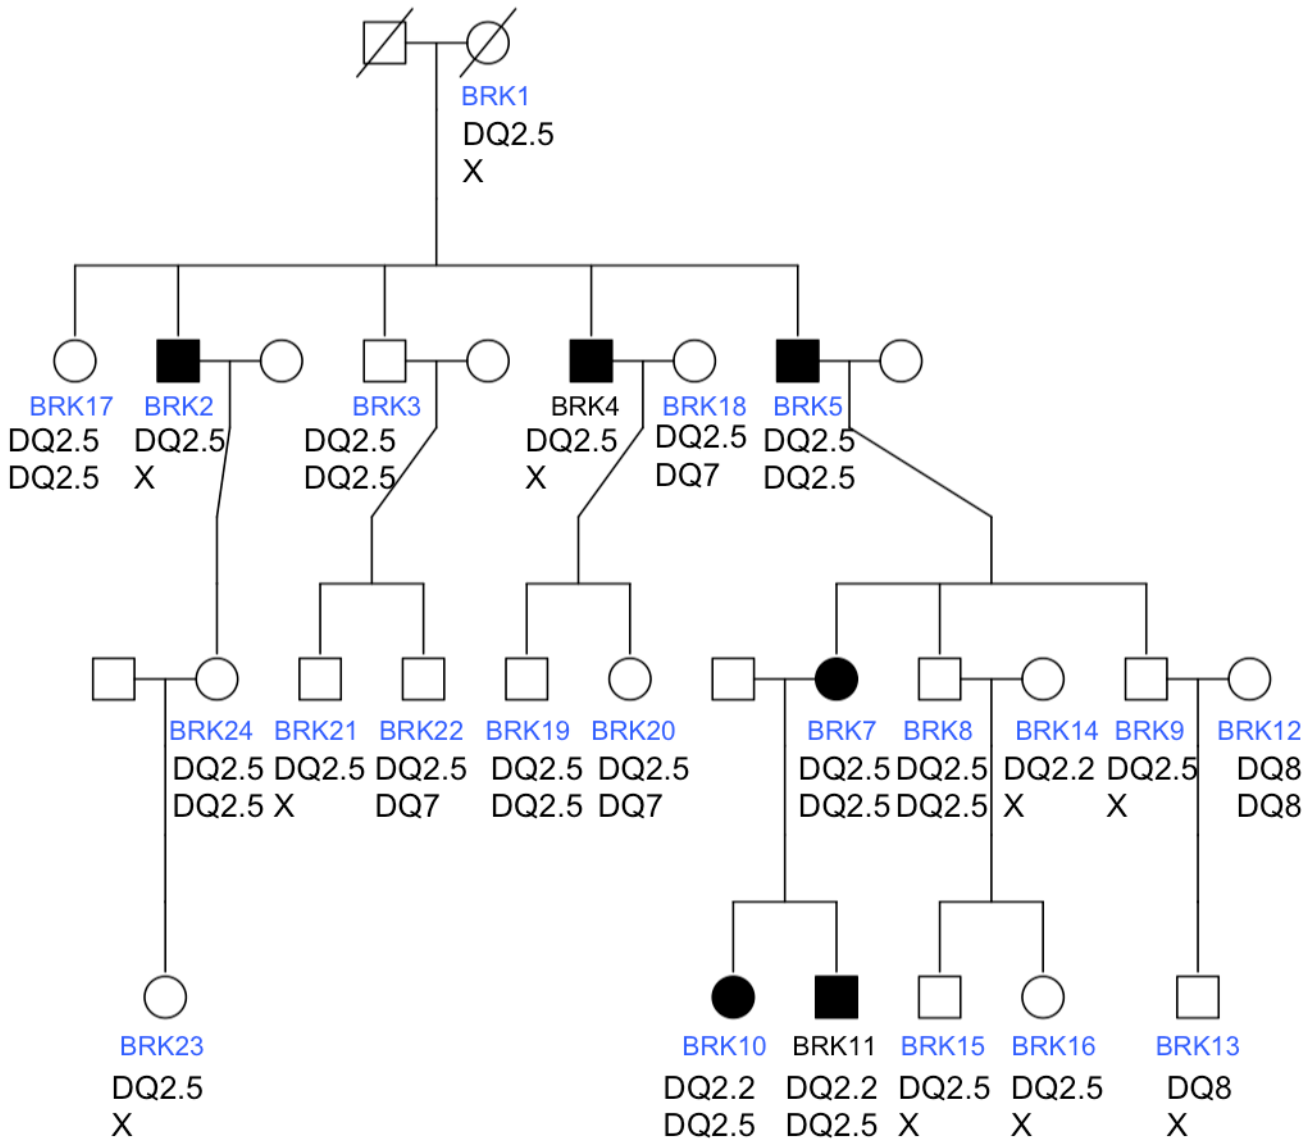

# Family BUT

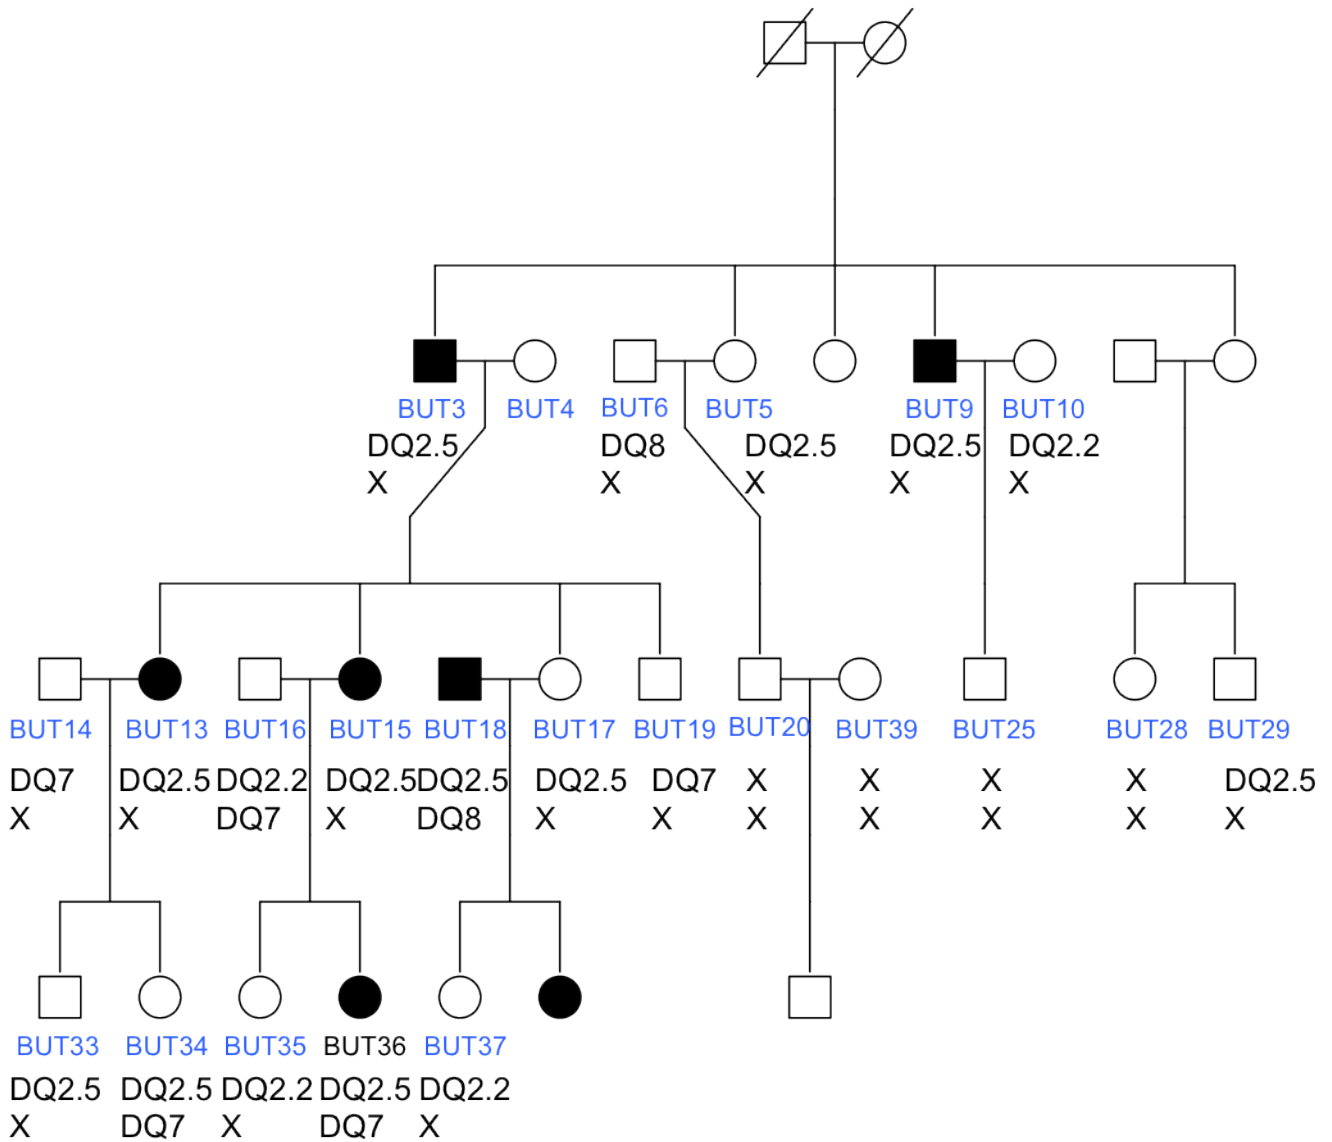

Family DA

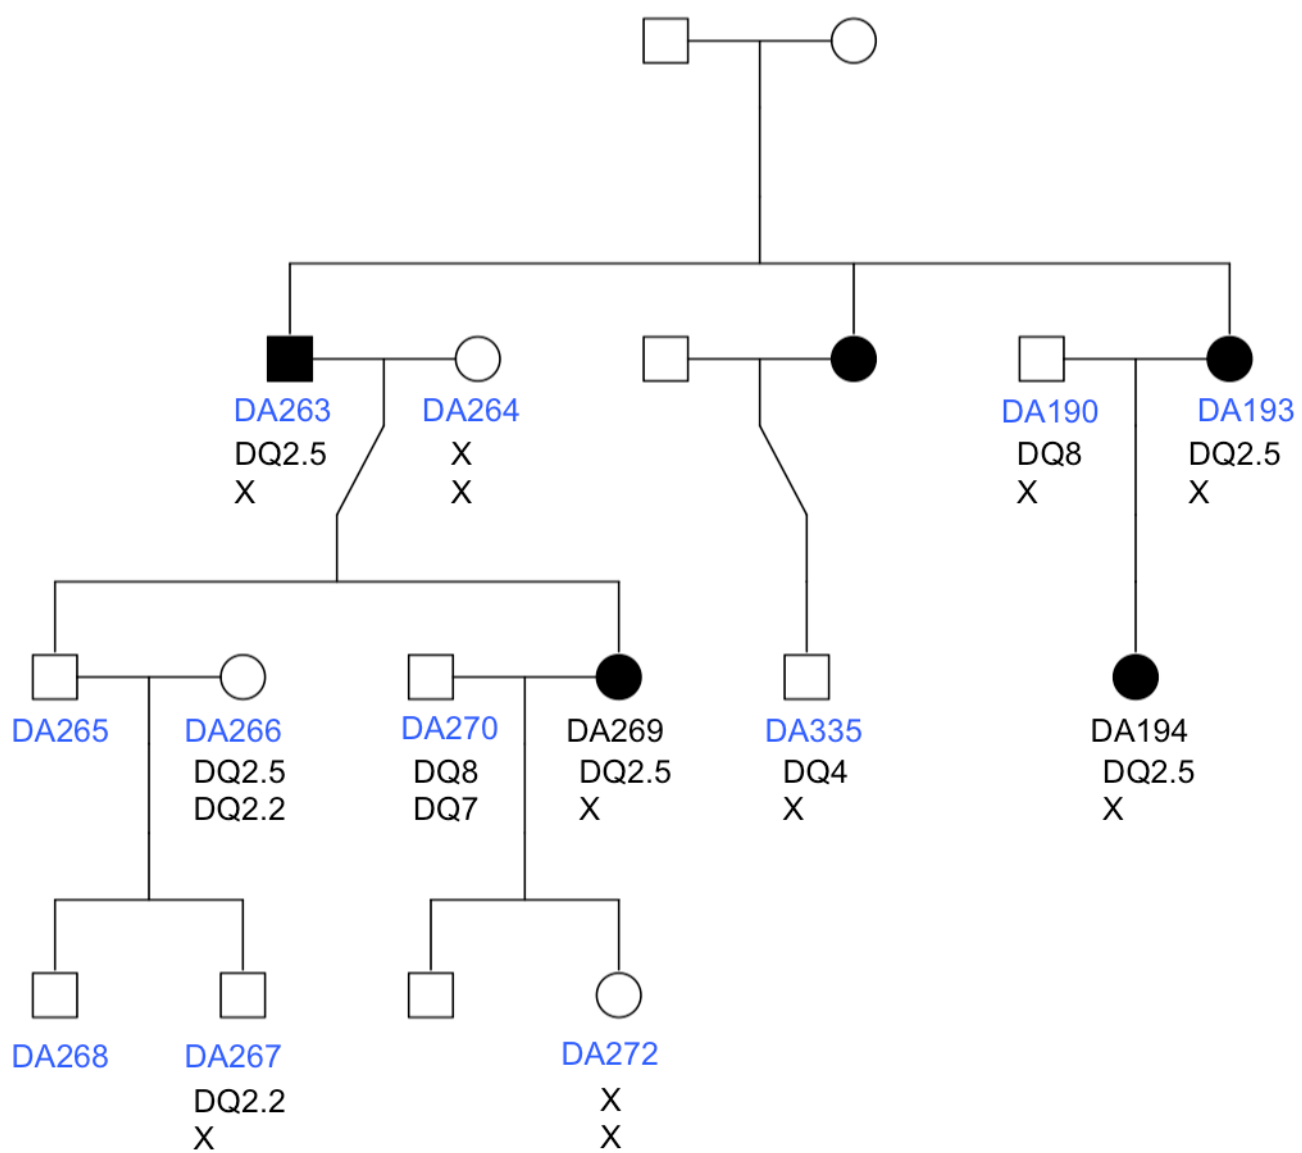

Family 008

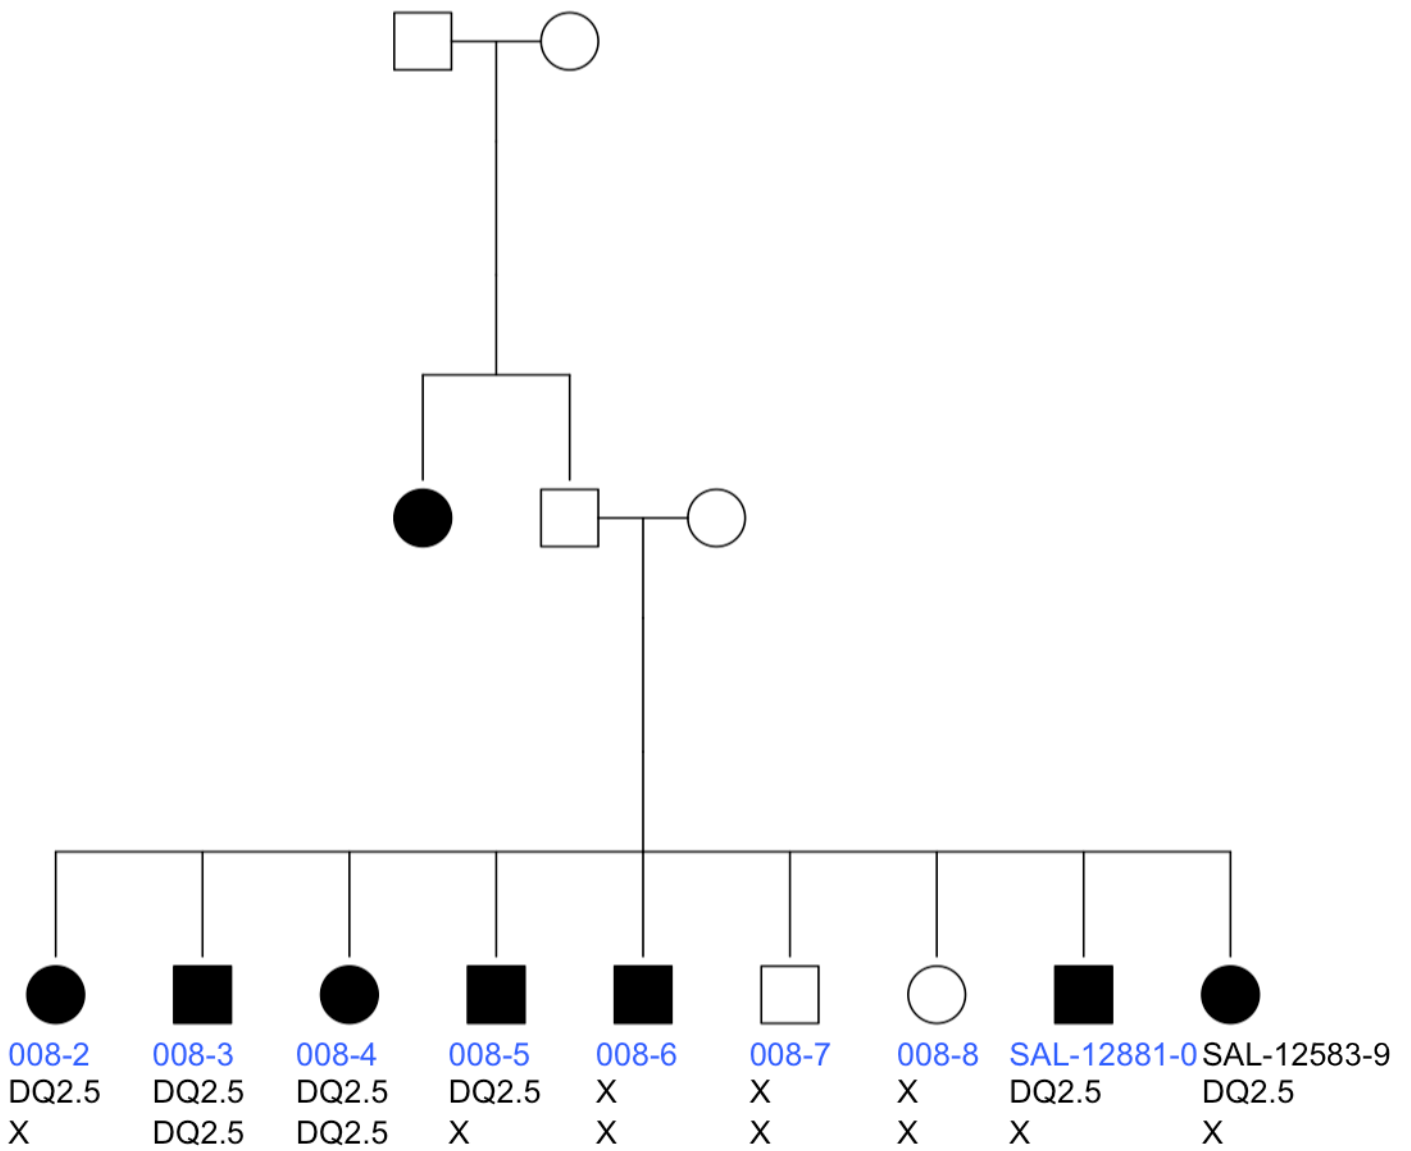

Family 014

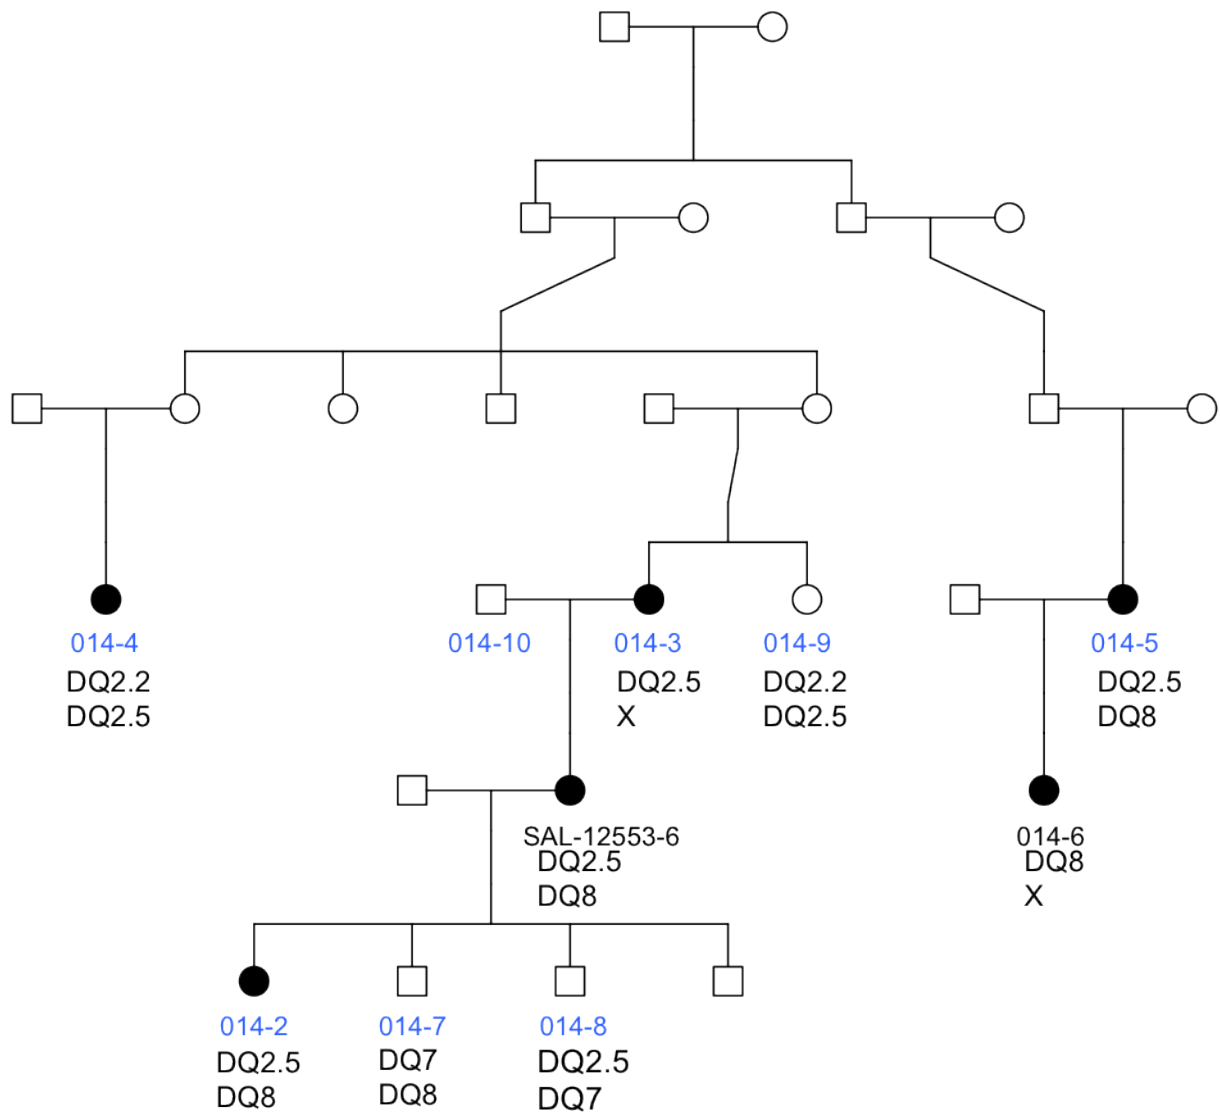



Family 063

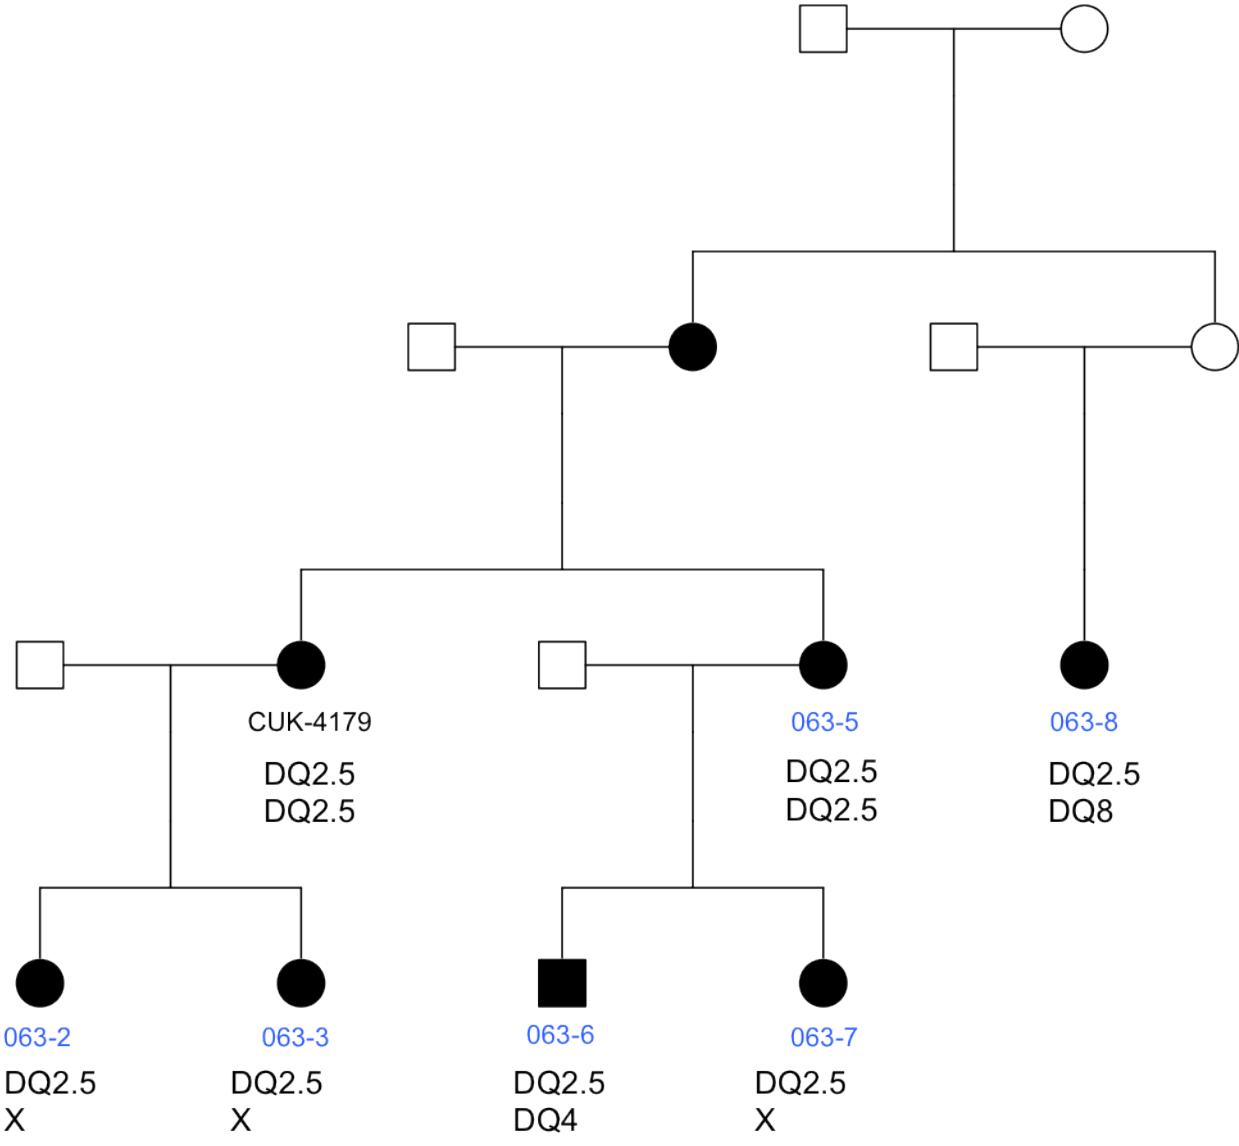

Family H

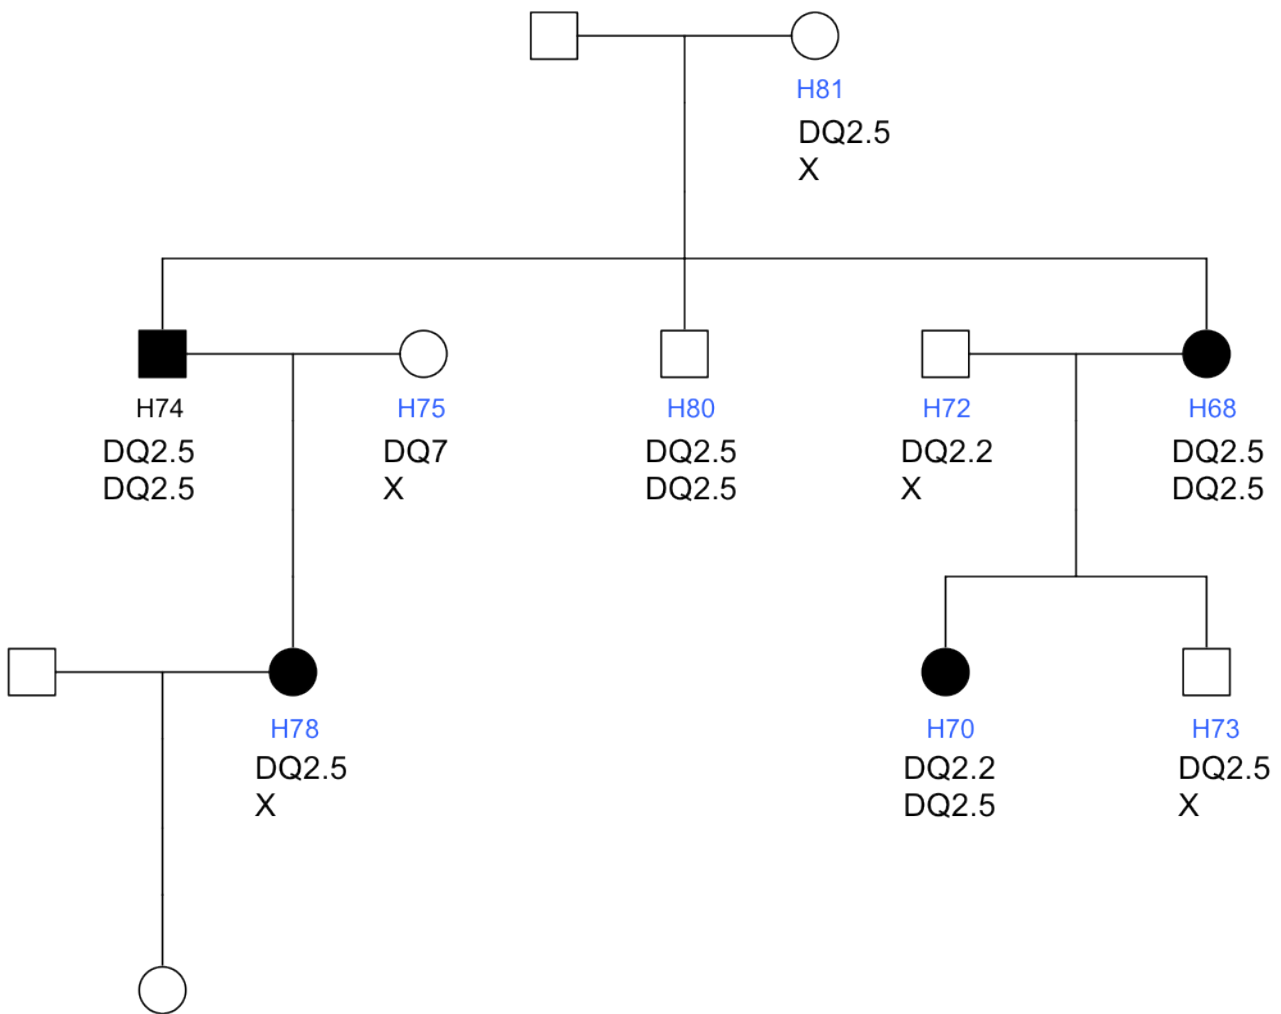

# Family HMN

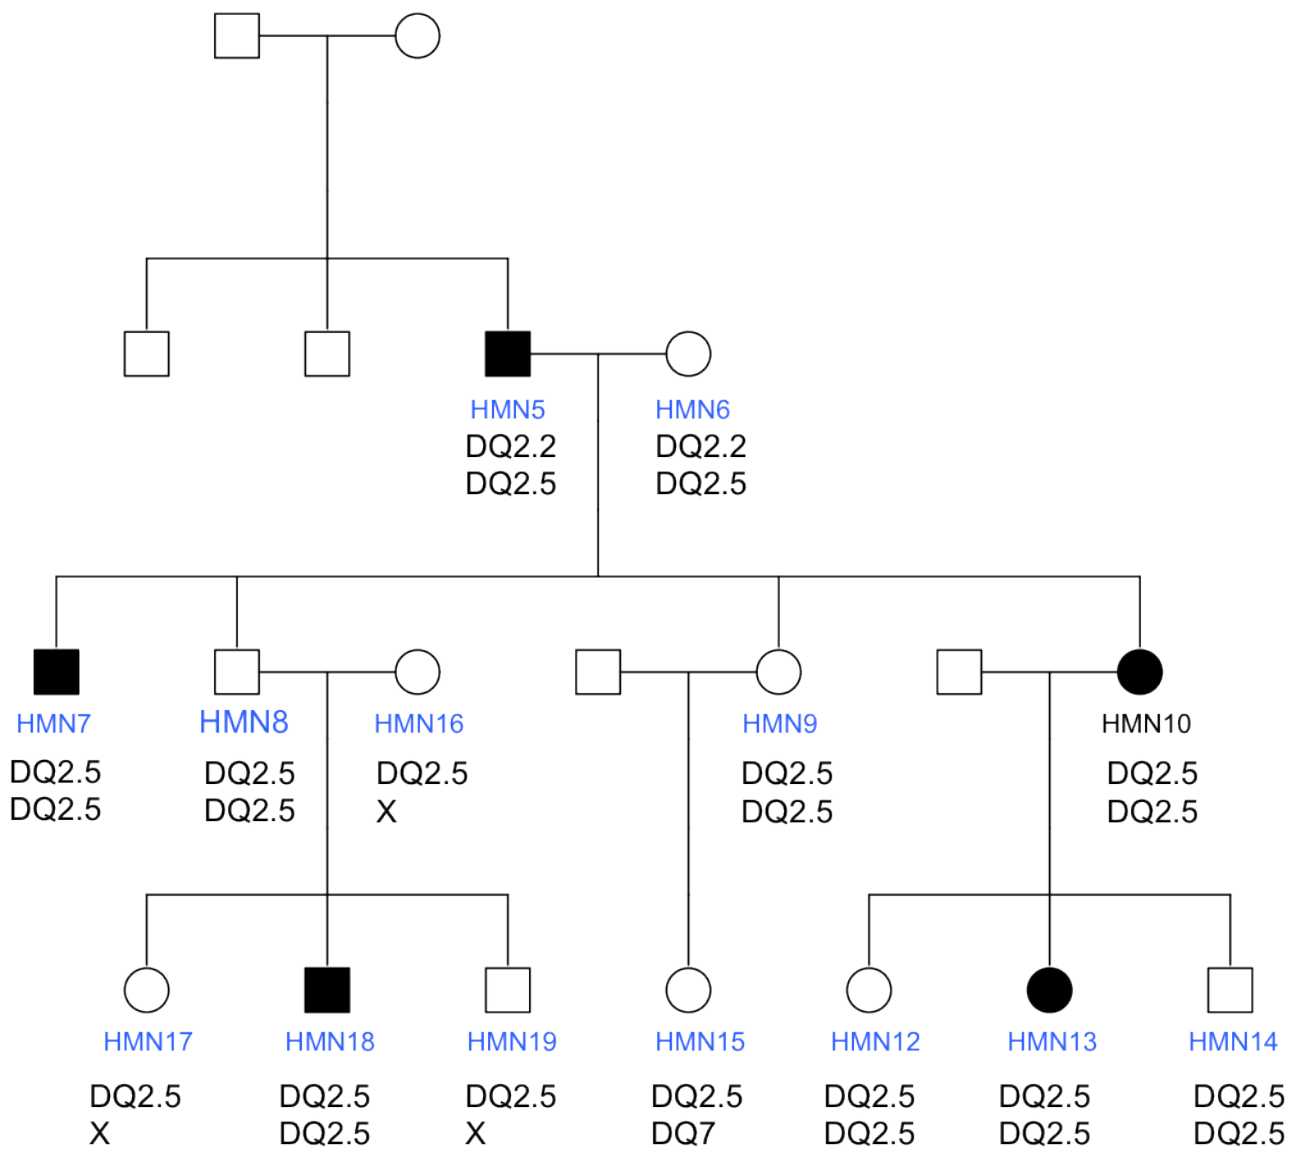

## Family SDY

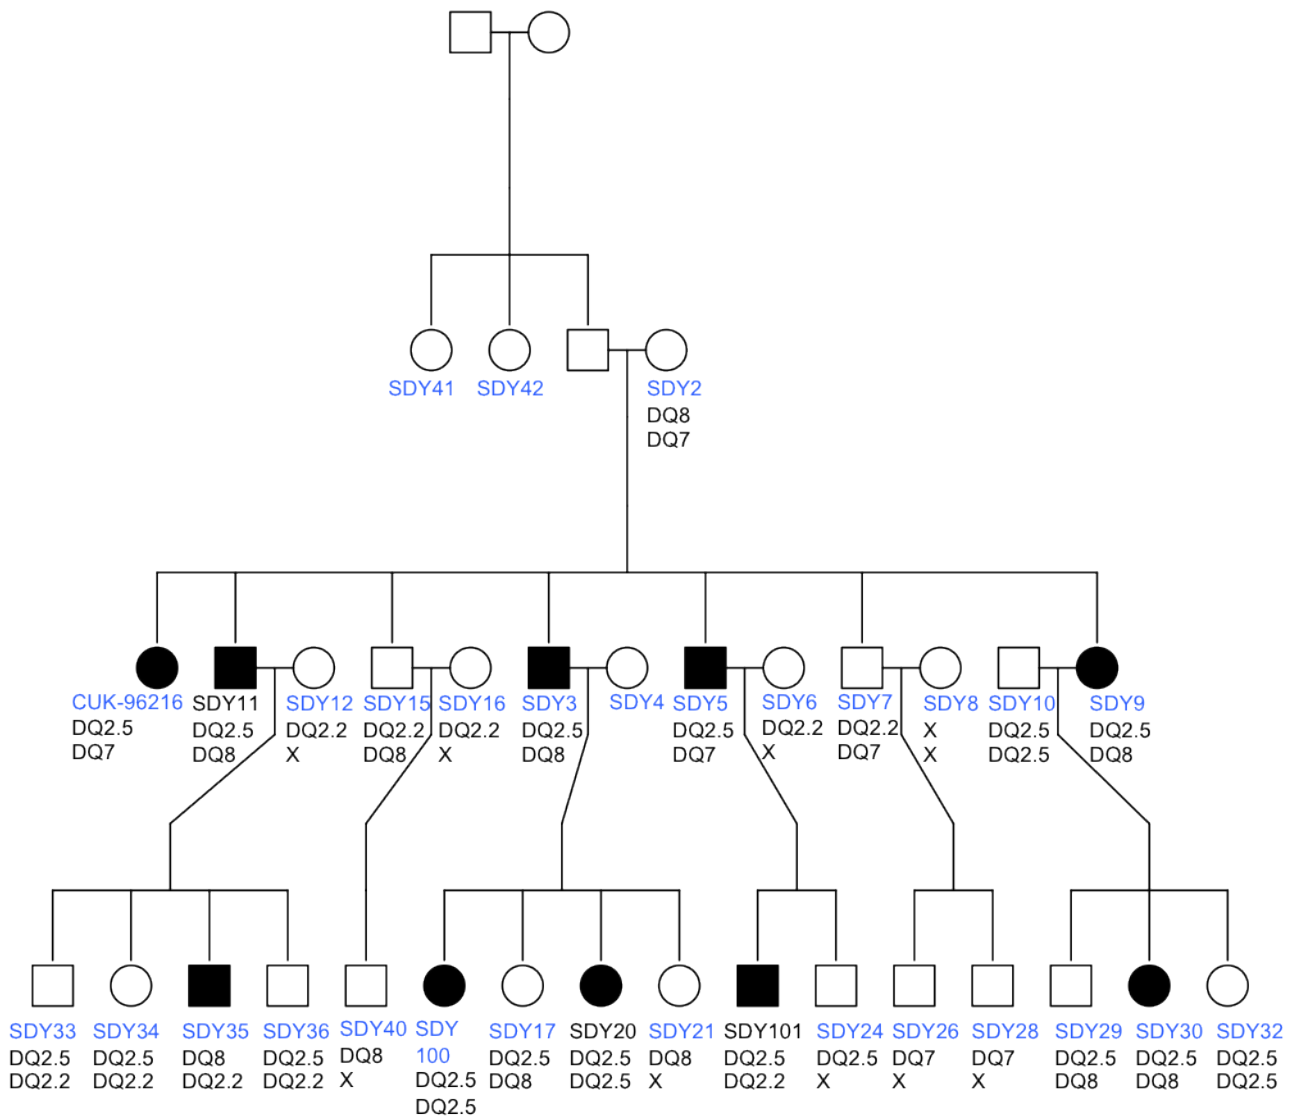

All subjects were genotyped on the Illumina ImmunoChip array. Sample names in black were exome sequenced. Sample names in blue were included in the linkage test. HLA genotypes are shown below the sample name. X denotes 'other genotype'.
